# Supplementary material for: Phytochemical Characterization, In Vitro Anti-Inflammatory, Anti-Diabetic, and Cytotoxic Activities of the Edible Aromatic Plant; Pulicaria jaubertii
Source: MDPI journal article supplement (doi:10.3390/molecules26010203), 2021-01-03
Supplement: s1 [file s1]

# Supplementary material

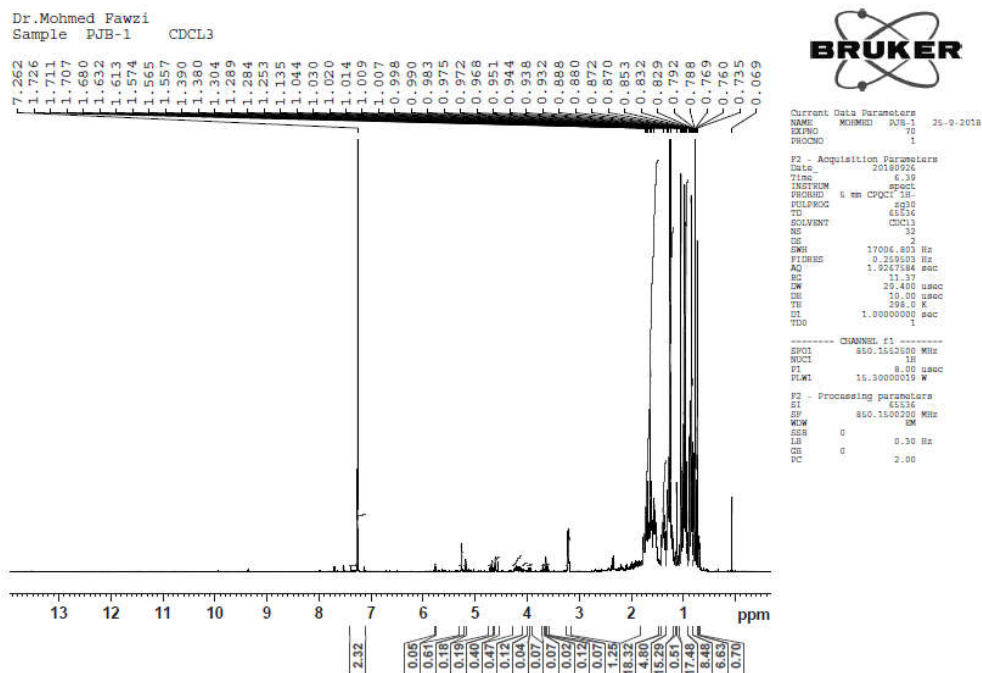

<sup>1</sup>H NMR of compound 1.

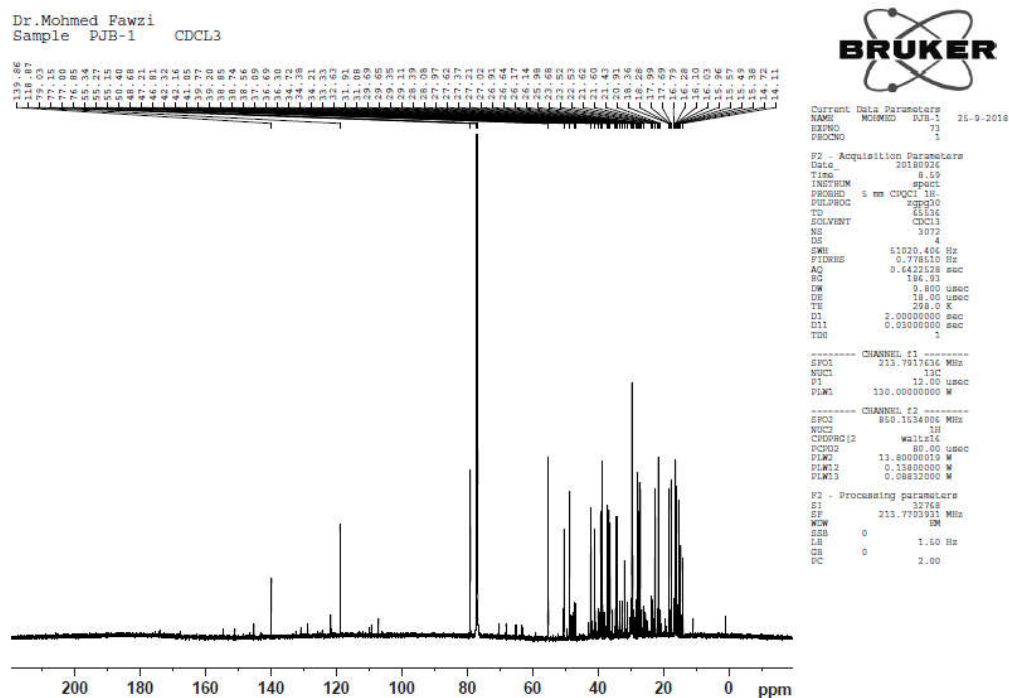

<sup>13</sup>C NMR of compound 1

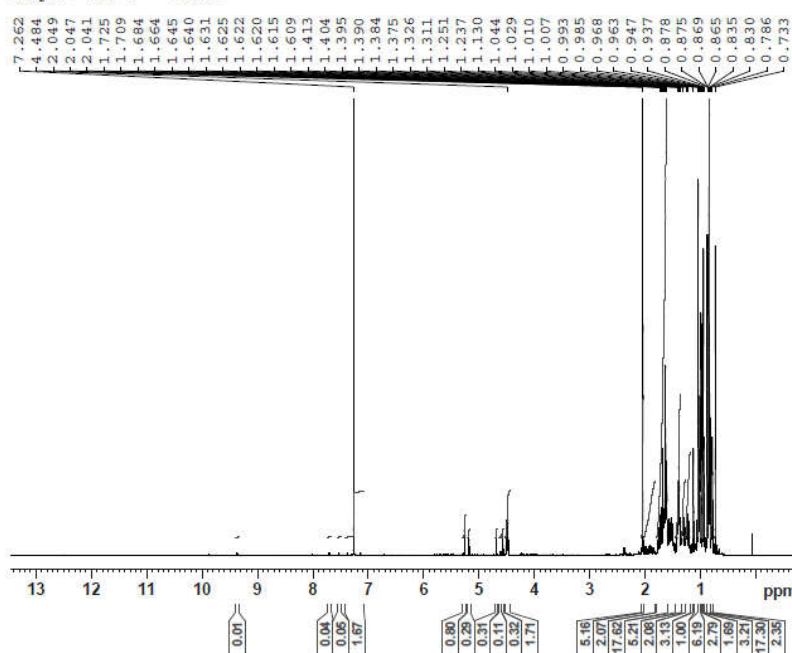<sup>1</sup>H NMR of compound 2

Dr.Mohmed Fawzi  
Sample PJA-3 CDCL3

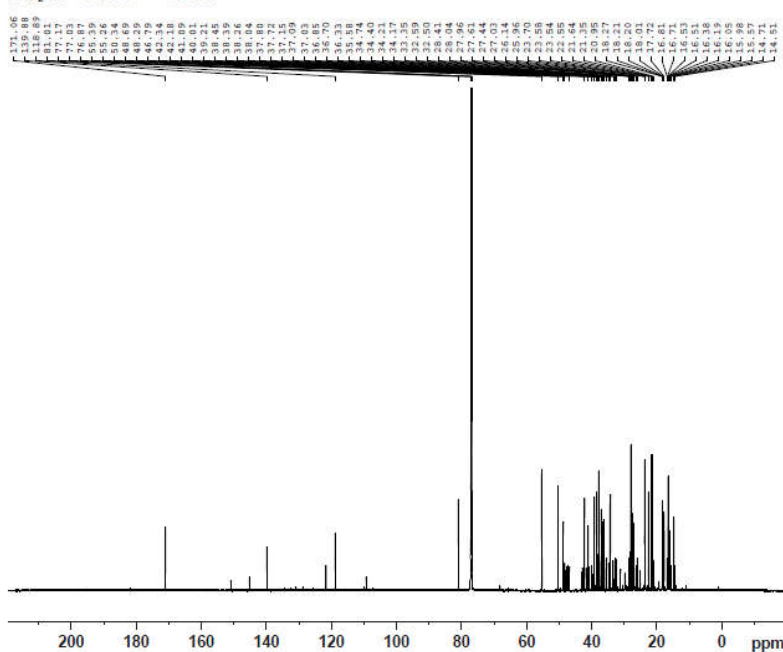 $^{13}\text{C}$  NMR of compound 2

Dr.Mohmed Fawzi  
Sample PJC-1 CDCL3

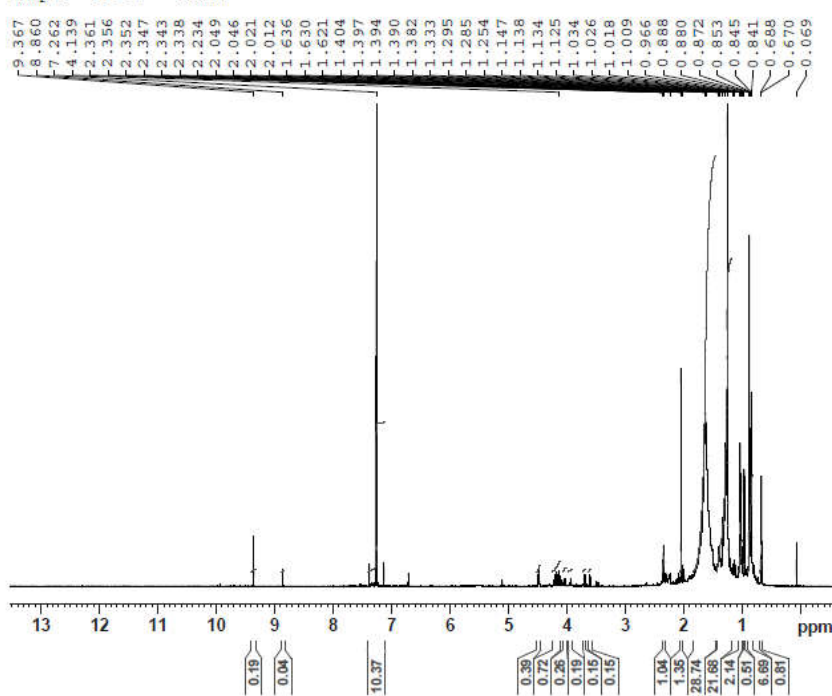

<sup>1</sup>H NMR of compound 3

Dr.Mohmed Fawzi  
Sample PJC-1 CDCL3

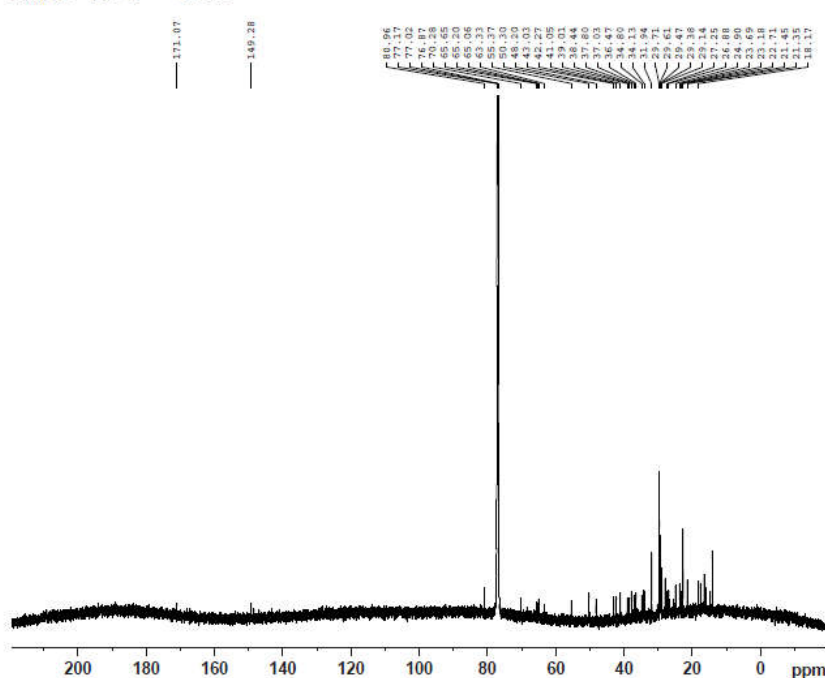

<sup>13</sup>C NMR of compound 3

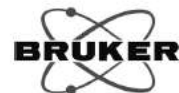

Current Data Parameters  
NAME MOHAMED PJC-1 25-9-2018  
EXPNO 110  
PROCNO 1  
F2 - Acquisition Parameters  
Date 20180926  
Time 12.12  
INSTRUM spect  
PROBHD 5 mm CPOCT 1H-  
PULPROG zgpg30  
TD 65536  
SOLVENT CDCL3  
NS 32  
DS 2  
SWH 17004.803 Hz  
FIDRES 0.259503 Hz  
AQ 1.9267584 sec  
RG 12.46  
DM 32.400 usec  
DE 18.00 usec  
TE 298.0 K  
D1 1.30000000 sec  
TD0 1  
----- CHANNEL f1 -----  
SFO1 850.1552600 MHz  
NUC1 1H  
P1 8.00 usec  
PLW1 15.30000019 W  
F2 - Processing parameters  
SI 65536  
SF 850.1500200 MHz  
WDW EM  
SSB 0  
LB 0.30 Hz  
GB 0  
PC 2.00

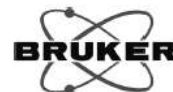

Current Data Parameters  
NAME MOHAMED PJC-1 25-9-2018  
EXPNO 112  
PROCNO 1  
F2 - Acquisition Parameters  
Date 20180926  
Time 12.44  
INSTRUM spect  
PROBHD 5 mm CPOCT 1H-  
PULPROG zgpg30  
TD 13336  
SOLVENT CDCL3  
NS 5072  
DS 4  
SWH 51020.406 Hz  
FIDRES 0.778510 Hz  
AQ 0.64232528 sec  
RG 186.93  
DM 5.800 usec  
DE 18.00 usec  
TE 298.0 K  
D1 3.00000000 sec  
D11 0.03000000 sec  
TD0 1  
----- CHANNEL f1 -----  
SFO1 213.7917436 MHz  
NUC1 13C  
P1 12.00 usec  
PLW1 130.00000000 W  
----- CHANNEL f2 -----  
SFO2 850.1534006 MHz  
NUC2 1H  
CPDPRG2 waltz16  
PCPD2 80.00 usec  
PLW2 13.80000019 W  
PLW12 0.13800000 W  
PLW13 0.88832000 W  
F2 - Processing parameters  
SI 13718  
SF 213.7703875 MHz  
WDW EM  
SSB 0  
LB 2.00 Hz  
GB 0  
PC 2.00

Dr.Mohmed Fawzi  
Sample PJB-3 CDCL<sub>3</sub>

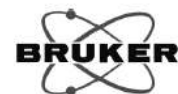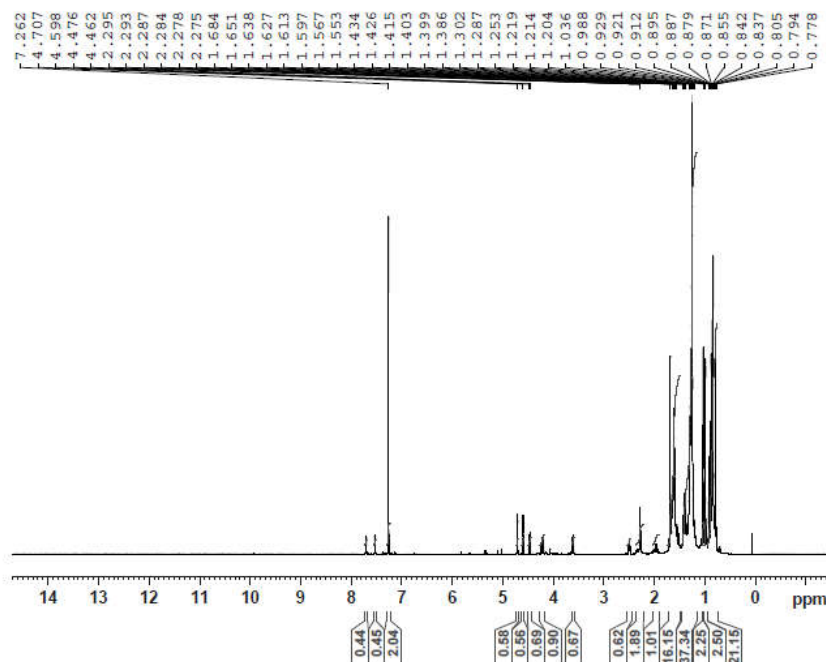

Current Data Parameters  
NAME: MOHMED FJB-3  
EXPNO: 80  
PROCNO: 1  
25-9-2018

F2 - Acquisition Parameters  
Date\_: 20180926  
Time: 9.46  
INSTRUM: spect  
PROBHD: 5 mm CPQCI 1H-  
PULPROG: zg30  
TD: 65536  
SOLVENT: CDCl<sub>3</sub>  
NS: 32  
DS: 2  
SWH: 17006.803 Hz  
FIDRES: 0.259503 Hz  
AQ: 1.9267584 sec  
RG: 10.55  
DM: 29.400 usec  
DE: 10.00 usec  
TE: 298.0 K  
D1: 1.00000000 sec  
TD0: 1

CHANNEL f1  
SP01: 850.1562500 MHz  
NUC1: 1H  
P1: 8.00 usec  
PLW1: 15.30000019 W

F2 - Processing parameters  
SI: 65536  
SF: 850.1562500 MHz  
WDW: DM  
SSB: 0  
LB: 0.30 Hz  
GB: 0  
PC: 2.00

<sup>1</sup>H NMR of compound 4

<sup>13</sup>C NMR of compound 4

Dr.Mohmed Fawzi  
Sample PJB-4 CDCL<sub>3</sub>

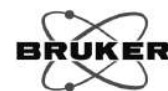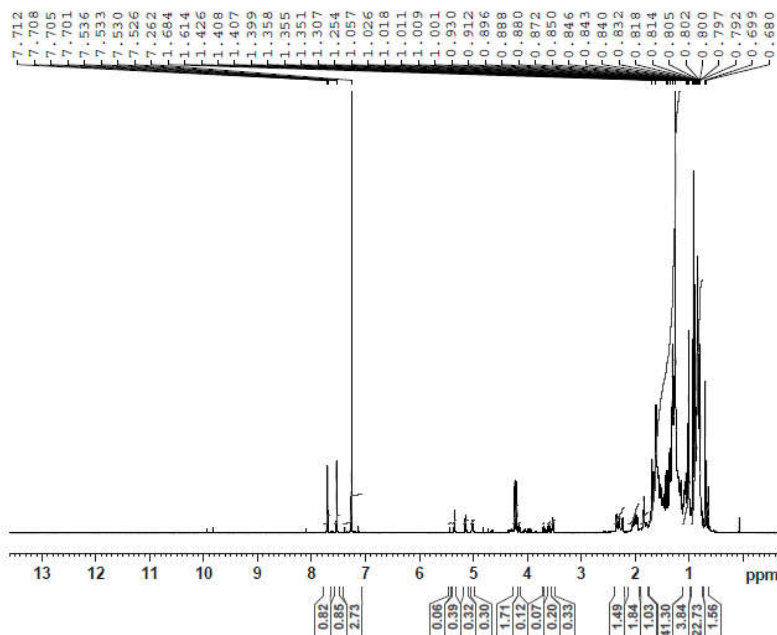

Current Data Parameters  
NAME: MOHMED FJB-4  
EXPNO: 100  
PROCNO: 1  
25-9-2018

F2 - Acquisition Parameters  
Date\_: 20180926  
Time: 10.34  
INSTRUM: spect  
PROBHD: 5 mm CPQCI 1H-  
PULPROG: zg30  
TD: 65536  
SOLVENT: CDCl<sub>3</sub>  
NS: 32  
DS: 2  
SWH: 17006.803 Hz  
FIDRES: 0.259503 Hz  
AQ: 1.9267584 sec  
RG: 11.37  
DM: 29.400 usec  
DE: 10.00 usec  
TE: 298.0 K  
D1: 1.00000000 sec  
TD0: 1

CHANNEL f1  
SP01: 850.1562500 MHz  
NUC1: 1H  
P1: 8.00 usec  
PLW1: 15.30000019 W

F2 - Processing parameters  
SI: 65536  
SF: 850.1562500 MHz  
WDW: DM  
SSB: 0  
LB: 0.30 Hz  
GB: 0  
PC: 2.00

<sup>1</sup>H NMR of compound 5

Dr.Mohmed Fawzi  
Sample PJB-4 CDCL3

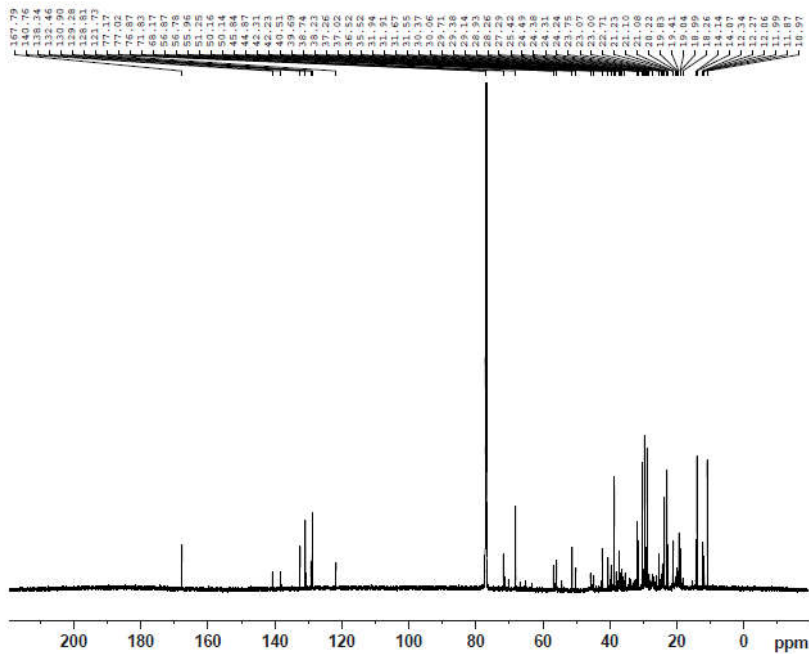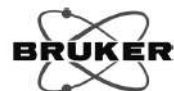

Current Data Parameters  
NAME MOHED PJB-4 25-9-2018  
EXPNO 102  
PROCNO 1

F2 - Acquisition Parameters  
Date\_ 20180926  
Time 10.40  
INSTRUM spect  
PROBHD 5 mm CPQCI 1H-  
PULPROG zgpg30  
TD 65536  
SOLVENT CDCl3  
NS 2032  
DS 4  
SWH 51020.400 Hz  
FIDRES 0.778110 Hz  
AQ 0.6422558 sec  
RG 186.93  
DM 9.800 usec  
DE 18.00 usec  
TE 298.0 K  
D1 2.00000000 sec  
D11 0.03000000 sec  
TD0 1

----- CHANNEL f1 -----  
SP01 213.7917616 MHz  
NUC1 13C  
P1 12.00 usec  
PLM1 136.0000000 W  
  
----- CHANNEL f2 -----  
SP02 850.1534006 MHz  
NUC2 1H  
CYCWD[2] wait4  
PCPD 80.00 usec  
PLM2 13.80000019 W  
PLM12 0.18000000 W  
PLM13 0.08832000 W

F2 - Processing parameters  
SI 32768  
SF 213.7703815 MHz  
WDW EM  
SSB 0  
LB 1.50 Hz  
GB 0  
PC 2.00

<sup>13</sup>C NMR of compound 5

Dr.Mohmed Fawzi  
Sample PJC-2 CDCL3

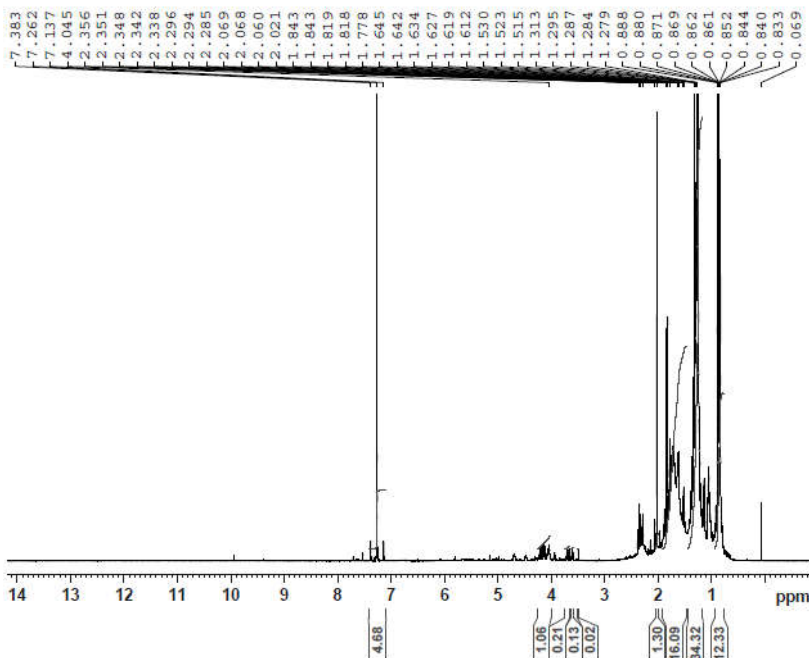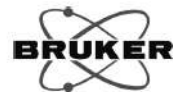

Current Data Parameters  
NAME MOHED PJC-2 25-9-2018  
EXPNO 100  
PROCNO 1

F2 - Acquisition Parameters  
Date\_ 20180926  
Time 14.37  
INSTRUM spect  
PROBHD 5 mm CPQCI 1H-  
PULPROG zg30  
TD 65536  
SOLVENT CDCl3  
NS 32  
DS 2  
SWH 17006.803 Hz  
FIDRES 0.259503 Hz  
AQ 1.2267184 sec  
RG 12.46  
DM 29.400 usec  
DE 10.00 usec  
TE 298.0 K  
D1 1.00000000 sec  
TD0 1

----- CHANNEL f1 -----  
SP01 850.1552100 MHz  
NUC1 1H  
P1 8.00 usec  
PLM1 15.30000019 W

F2 - Processing parameters  
SI 65536  
SF 850.1500200 MHz  
WDW EM  
SSB 0  
LB 0.30 Hz  
GB 0  
PC 2.00

<sup>1</sup>H NMR of compound 6

Dr.Mohmed Fawzi  
Sample PJC-2 CDCL3

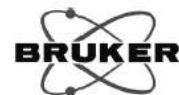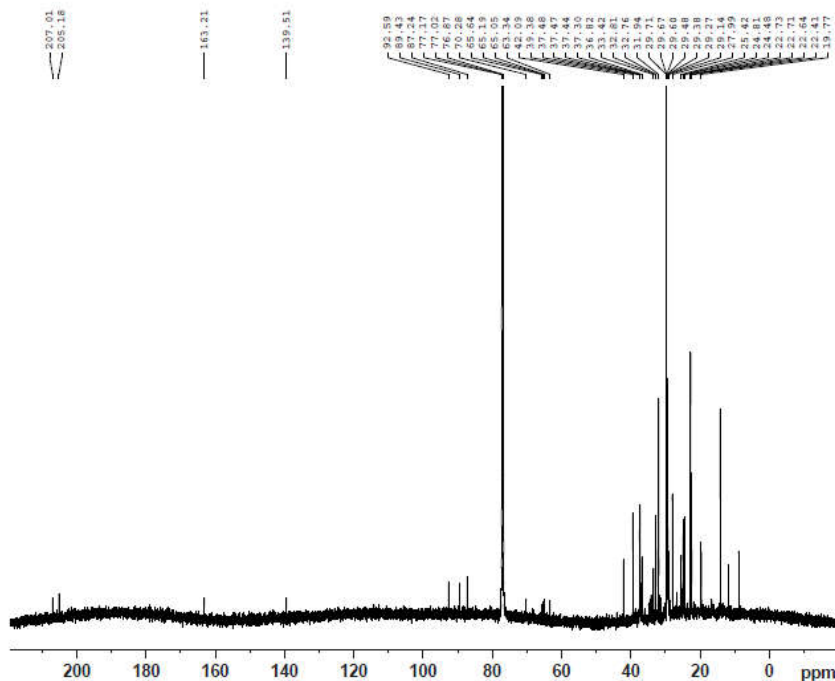

Current Data Parameters  
NAME MOHMED PJC-2 25-9-2018  
EXPNO 122  
PROCNO 1

F2 - Acquisition Parameters  
Date\_ 20180926  
Time 16:57  
INSTRUM spect  
PROBHD 5 mm CPQCI 1H-  
PULPROG zgpg30  
TD 65536  
SOLVENT CDCL3  
NS 3072  
DS 4  
SWH 51020.400 Hz  
FIDRES 0.778510 Hz  
AQ 0.6422528 sec  
RG 186.55  
DM 9.800 usec  
DE 18.00 usec  
TE 298.0 K  
D1 2.00000000 sec  
D11 0.03000000 sec  
TD0 1

----- CHANNEL f1 -----  
SFO1 253.7017634 MHz  
NUC1 13C  
P1 12.00 usec  
PLM1 130.0000000 W

----- CHANNEL f2 -----  
SFO2 850.1534006 MHz  
NUC2 1H  
CPDPRG2 waltz16  
PCPD 85.00 usec  
PLM2 13.80000019 W  
PLM12 0.13800000 W  
PLM13 0.08832000 W

F2 - Processing parameters  
SI 32768  
SF 253.7703875 MHz  
MCM RM  
SSB 0  
LB 1.50 Hz  
GB 0  
PC 2.00

$^{13}\text{C}$  NMR of compound 6
